# Supplementary material for: Ferrocene functionalized graphene: preparation, characterization and application as an efficient catalyst for the thermal decomposition of TKX-50
Source: Royal Society of Chemistry journal article supplement (doi:10.1039/d1cp02777h), 2021-01-01
Supplement: d1cp02777h1.pdf [file d1cp02777h1.pdf]

## Ferrocene functionalized graphene: preparation, characterization and efficient catalyst for thermal decomposition of TKX-50

Ming Zhang <sup>a</sup>, Fengqi Zhao <sup>a\*</sup>, Hui Li <sup>a</sup>, Shuai Dong <sup>b</sup>, Yanjing Yang <sup>b</sup>, Xiaoting Hou <sup>c</sup>, Ting An <sup>b</sup>, Zhoufeng Jiang <sup>a</sup>

<sup>a</sup> Science and Technology on Combustion and Explosion Laboratory, Xi'an Modern Chemistry Research Institute, Xi'an 710065, China

<sup>b</sup> Xi'an Modern Chemistry Research Institute, Xi'an 710065, China

<sup>c</sup> Shanxi North Xing'an Chemical Industry Co., Ltd, Taiyuan, 030008, China

Table S1 Contents of ferrocene functionalized graphene characterized using and ICP

| Catalysts | Elemental analysis |      |      | ICP analysis |
|-----------|--------------------|------|------|--------------|
|           | C                  | H    | N    | Fe           |
| G-550-Fe  | 39.22              | 4.76 | 5.25 | 1.03         |
| G-551-Fe  | 38.71              | 4.55 | 4.39 | 2.64         |
| G-602-Fe  | 46.35              | 4.44 | 5.23 | 4.46         |
| G-792-Fe  | 40.02              | 4.50 | 4.93 | 1.96         |
| G-902-Fe  | 44.16              | 4.71 | 3.82 | 3.38         |

Table S2 Decomposition peak temperature of TKX-50 catalyzed by ferrocene functionalized graphene

| Catalysts | $T_p/^\circ\text{C}$ | $T_p/^\circ\text{C}$                        |                                              |                                              |                                              |
|-----------|----------------------|---------------------------------------------|----------------------------------------------|----------------------------------------------|----------------------------------------------|
|           |                      | $\beta=5^\circ\text{C}\cdot\text{min}^{-1}$ | $\beta=10^\circ\text{C}\cdot\text{min}^{-1}$ | $\beta=15^\circ\text{C}\cdot\text{min}^{-1}$ | $\beta=20^\circ\text{C}\cdot\text{min}^{-1}$ |
| /         | $T_{LDP}$            | 232.3                                       | 239.9                                        | 245.1                                        | 248.5                                        |
|           | $T_{HDP}$            | 260.8                                       | 268.0                                        | 272.9                                        | 275.1                                        |
| G-792-Fe  | $T_{LDP}$            | 194.9                                       | 203.6                                        | 208.3                                        | 211.7                                        |
|           | $T_{HDP}$            | 207.5                                       | 217.5                                        | 223.4                                        | 228.1                                        |
| G-550-Fe  | $T_{LDP}$            | 199.9                                       | 208.2                                        | 210.9                                        | 215.3                                        |
|           | $T_{HDP}$            | 220.5                                       | 233.6                                        | 238.3                                        | 242.5                                        |
| G-602-Fe  | $T_{LDP}$            | 195.8                                       | 203.9                                        | 208.2                                        | 212.1                                        |
|           | $T_{HDP}$            | 215.8                                       | 225.9                                        | 231.9                                        | 237.6                                        |
| G-551-Fe  | $T_{LDP}$            | 201.1                                       | 209.0                                        | 214.5                                        | 218.1                                        |
|           | $T_{HDP}$            | 227.0                                       | 238.7                                        | 245.7                                        | 250.0                                        |
| G-902-Fe  | $T_{LDP}$            | 200.4                                       | 208.2                                        | 214.2                                        | 216.2                                        |
|           | $T_{HDP}$            | 221.6                                       | 232.8                                        | 243.0                                        | 246.7                                        |

Table S3 Kinetic parameters of TKX-50 calculated by traditional Kissinger and Ozawa methods

| Catalysts | $T_p/^\circ\text{C}$ | Kissinger                           |                              |       | Ozawa                               |       |
|-----------|----------------------|-------------------------------------|------------------------------|-------|-------------------------------------|-------|
|           |                      | $E_a/\text{kJ}\cdot\text{mol}^{-1}$ | $\text{Lg}(A/\text{s}^{-1})$ | $r$   | $E_a/\text{kJ}\cdot\text{mol}^{-1}$ | $r$   |
| /         | $T_{LDP}$            | 178.2                               | 16.2                         | 0.999 | 177.5                               | 0.999 |
|           | $T_{HDP}$            | 221.4                               | 19.5                         | 0.998 | 219.1                               | 0.998 |
| G-792-Fe  | $T_{LDP}$            | 147.5                               | 14.3                         | 0.999 | 147.8                               | 0.999 |
|           | $T_{HDP}$            | 127.3                               | 11.6                         | 0.999 | 128.8                               | 0.999 |
| G-550-Fe  | $T_{LDP}$            | 168.8                               | 16.5                         | 0.993 | 168.1                               | 0.993 |
|           | $T_{HDP}$            | 123.8                               | 10.8                         | 0.992 | 125.7                               | 0.993 |

|          |           |       |      |       |       |       |
|----------|-----------|-------|------|-------|-------|-------|
| G-602-Fe | $T_{LDP}$ | 154.6 | 15.1 | 0.999 | 154.5 | 0.999 |
|          | $T_{HDP}$ | 125.3 | 11.1 | 0.998 | 127.1 | 0.998 |
| G-551-Fe | $T_{LDP}$ | 149.2 | 14.2 | 0.999 | 149.5 | 0.999 |
|          | $T_{HDP}$ | 121.5 | 10.4 | 0.999 | 123.6 | 0.999 |
| G-902-Fe | $T_{LDP}$ | 154.4 | 14.9 | 0.995 | 154.5 | 0.996 |
|          | $T_{HDP}$ | 105.1 | 8.7  | 0.994 | 107.9 | 0.995 |

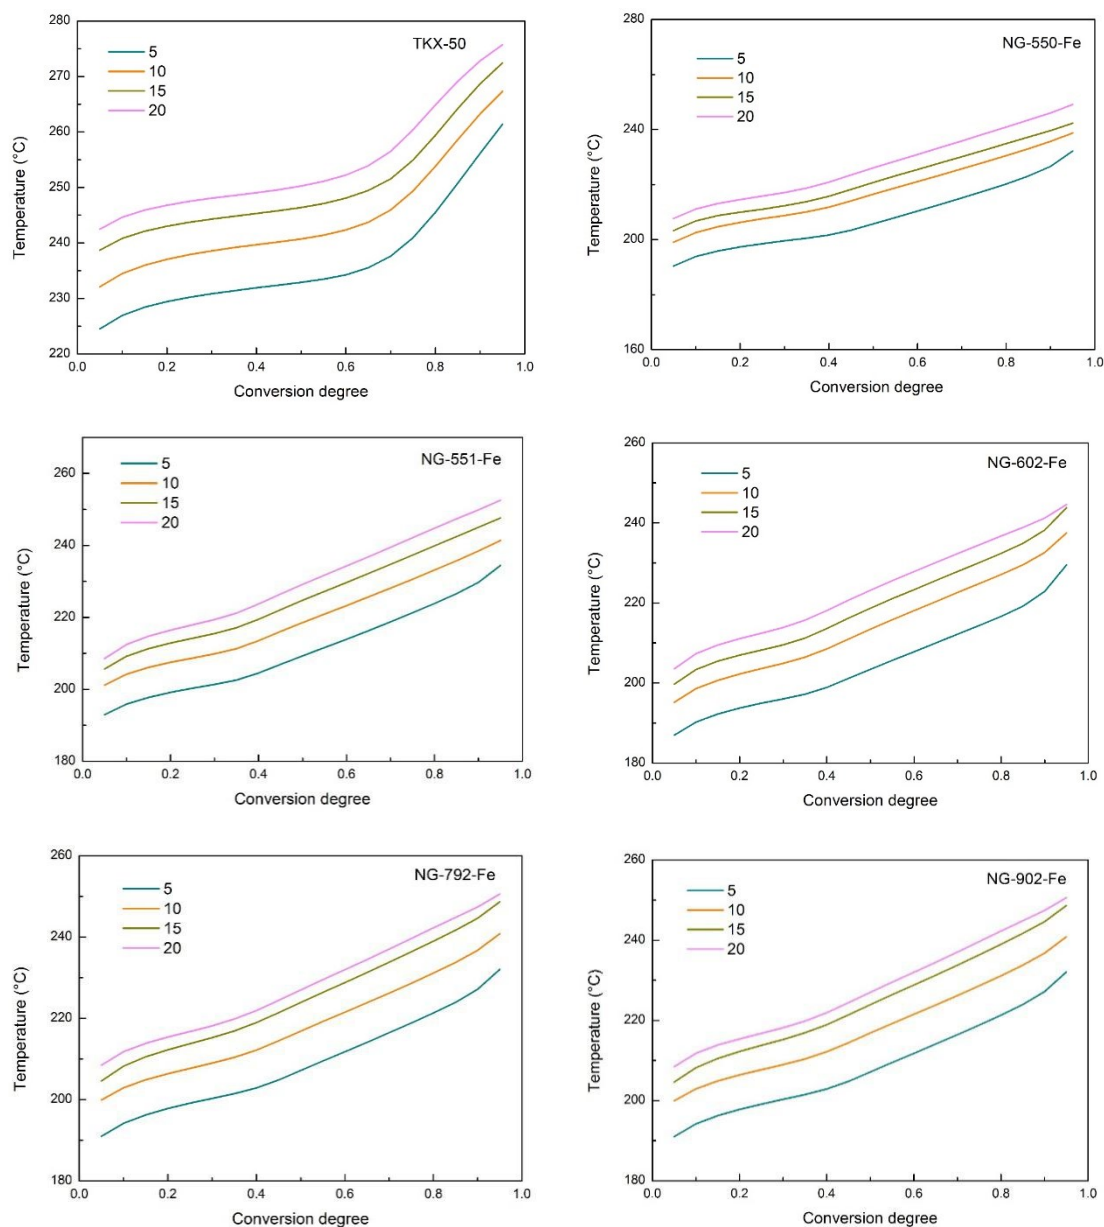

Fig. S1 Conversion degree-temperature curves of TKX-50 catalyzed with ferrocene functionalized graphene at different heating rates

Table S4 Kinetic parameters of TKX-50 mixed with graphene functionalized ferrocene obtained using nonlinear Kissinger model

| $\alpha$ | TKX-50 |      |       | TKX-50+G-550-Fe |      |       | TKX-50+G-551-Fe |      |       | TKX-50+G-602-Fe |      |       | TKX-50+G-792-Fe |      |       | TKX-50+G-902-Fe |      |       |
|----------|--------|------|-------|-----------------|------|-------|-----------------|------|-------|-----------------|------|-------|-----------------|------|-------|-----------------|------|-------|
|          | $E_a$  | LgA  | r     | $E_a$           | LgA  | r     | $E_a$           | LgA  | r     | $E_a$           | LgA  | r     | $E_a$           | LgA  | r     | $E_a$           | LgA  | r     |
| 0.05     | 153.2  | 13.8 | 0.996 | 143.1           | 14.0 | 0.999 | 156.8           | 15.4 | 0.999 | 145.8           | 14.4 | 1.000 | 157.3           | 15.7 | 1.000 | 140.4           | 13.6 | 1.000 |
| 0.10     | 158.0  | 14.3 | 0.997 | 144.7           | 14.0 | 0.999 | 150.2           | 14.6 | 1.000 | 143.4           | 14.0 | 1.000 | 150.5           | 14.8 | 1.000 | 139.8           | 13.4 | 1.000 |

|      |       |      |       |       |      |       |       |      |       |       |      |       |       |      |       |       |      |       |
|------|-------|------|-------|-------|------|-------|-------|------|-------|-------|------|-------|-------|------|-------|-------|------|-------|
| 0.15 | 161.2 | 14.6 | 0.998 | 146.8 | 14.2 | 0.998 | 147.3 | 14.2 | 1.000 | 143.2 | 13.9 | 1.000 | 147.8 | 14.4 | 1.000 | 140.3 | 13.4 | 1.000 |
| 0.20 | 164.3 | 14.8 | 0.998 | 148.6 | 14.3 | 0.997 | 145.5 | 13.9 | 1.000 | 143.5 | 13.9 | 1.000 | 145.9 | 14.2 | 1.000 | 140.6 | 13.4 | 0.999 |
| 0.25 | 165.0 | 14.9 | 0.999 | 149.0 | 14.3 | 0.996 | 143.7 | 13.7 | 1.000 | 143.2 | 13.8 | 1.000 | 144.3 | 13.9 | 1.000 | 140.4 | 13.3 | 0.999 |
| 0.30 | 166.6 | 15.0 | 0.999 | 147.3 | 14.1 | 0.996 | 141.4 | 13.4 | 1.000 | 141.4 | 13.5 | 0.999 | 142.1 | 13.7 | 1.000 | 138.8 | 13.1 | 0.998 |
| 0.35 | 167.2 | 15.1 | 0.999 | 142.7 | 13.5 | 0.996 | 136.7 | 12.8 | 1.000 | 137.0 | 13.0 | 0.999 | 139.3 | 13.3 | 0.999 | 135.6 | 12.7 | 0.998 |
| 0.40 | 167.5 | 15.1 | 0.999 | 135.4 | 12.7 | 0.996 | 134.4 | 12.5 | 1.000 | 132.6 | 12.4 | 1.000 | 135.6 | 12.8 | 0.999 | 131.0 | 12.1 | 0.998 |
| 0.45 | 167.9 | 15.1 | 0.999 | 130.2 | 12.0 | 0.996 | 133.0 | 12.2 | 1.000 | 131.1 | 12.2 | 1.000 | 132.6 | 12.4 | 0.998 | 128.3 | 11.8 | 0.998 |
| 0.50 | 166.2 | 14.9 | 0.999 | 129.5 | 11.9 | 0.997 | 132.2 | 12.1 | 0.999 | 130.7 | 12.1 | 1.000 | 131.1 | 12.2 | 0.998 | 127.9 | 11.7 | 0.998 |
| 0.55 | 164.9 | 14.8 | 0.999 | 129.8 | 11.8 | 0.997 | 131.5 | 11.9 | 0.999 | 130.8 | 12.0 | 1.000 | 130.4 | 12.1 | 0.998 | 127.9 | 11.6 | 0.998 |
| 0.60 | 162.7 | 14.5 | 0.999 | 130.6 | 11.9 | 0.997 | 131.3 | 11.8 | 0.999 | 131.4 | 12.0 | 0.999 | 130.2 | 12.0 | 0.998 | 127.9 | 11.5 | 0.998 |
| 0.65 | 159.5 | 14.1 | 0.999 | 131.5 | 11.9 | 0.997 | 131.3 | 11.8 | 0.999 | 132.1 | 12.0 | 0.999 | 130.2 | 11.9 | 0.998 | 127.9 | 11.5 | 0.998 |
| 0.70 | 157.6 | 13.9 | 0.998 | 132.7 | 11.9 | 0.996 | 131.3 | 11.7 | 0.999 | 133.0 | 12.1 | 0.999 | 130.5 | 11.9 | 0.998 | 127.9 | 11.4 | 0.998 |
| 0.75 | 155.4 | 13.5 | 0.996 | 134.1 | 12.0 | 0.996 | 132.6 | 11.8 | 0.999 | 134.0 | 12.1 | 0.999 | 130.7 | 11.9 | 0.997 | 127.6 | 11.3 | 0.997 |
| 0.80 | 159.6 | 13.8 | 0.996 | 136.3 | 12.2 | 0.996 | 132.6 | 11.7 | 0.999 | 135.5 | 12.2 | 0.999 | 130.5 | 11.8 | 0.997 | 127.7 | 11.2 | 0.997 |
| 0.85 | 170.2 | 14.7 | 0.997 | 140.4 | 12.5 | 0.995 | 135.6 | 11.9 | 0.998 | 139.1 | 12.5 | 0.999 | 130.0 | 11.6 | 0.994 | 129.1 | 11.3 | 0.997 |
| 0.90 | 190.1 | 16.6 | 0.997 | 149.8 | 13.4 | 0.992 | 141.6 | 12.5 | 0.998 | 149.2 | 13.5 | 0.998 | 133.9 | 11.9 | 0.977 | 134.3 | 11.8 | 0.996 |
| 0.95 | 224.8 | 19.8 | 0.996 | 174.1 | 15.9 | 0.976 | 159.3 | 14.2 | 0.991 | 175.6 | 16.1 | 0.987 | 159.6 | 14.2 | 0.955 | 146.8 | 12.9 | 0.992 |

Table S5 Kinetic parameters of TKX-50 catalyzed by ferrocene functionalized graphene obtained using nonlinear Flynn-Wall-Ozawa model

| a    | TKX-50 |       | TKX-50+G-550-Fe |       | TKX-50+G-551-Fe |       | TKX-50+G-602-Fe |       | TKX-50+G-792-Fe |       | TKX-50+G-902-Fe |       |
|------|--------|-------|-----------------|-------|-----------------|-------|-----------------|-------|-----------------|-------|-----------------|-------|
|      | $E_a$  | r     | $E_a$           | r     | $E_a$           | r     | $E_a$           | r     | $E_a$           | r     | $E_a$           | r     |
| 0.05 | 153.7  | 0.997 | 143.6           | 0.999 | 156.6           | 0.999 | 146.0           | 1.000 | 157.0           | 1.000 | 141.1           | 1.000 |
| 0.10 | 158.3  | 0.998 | 145.1           | 0.999 | 150.3           | 1.000 | 143.8           | 1.000 | 150.6           | 1.000 | 140.5           | 1.000 |
| 0.15 | 161.4  | 0.998 | 147.1           | 0.998 | 147.6           | 1.000 | 143.6           | 1.000 | 148.1           | 1.000 | 141.0           | 1.000 |
| 0.20 | 164.3  | 0.998 | 148.9           | 0.997 | 146.0           | 1.000 | 144.0           | 1.000 | 146.2           | 1.000 | 141.3           | 0.999 |
| 0.25 | 165.0  | 0.999 | 149.2           | 0.996 | 144.3           | 1.000 | 143.7           | 1.000 | 144.7           | 1.000 | 141.1           | 0.999 |
| 0.30 | 166.5  | 0.999 | 147.6           | 0.996 | 142.1           | 1.000 | 142.0           | 0.999 | 142.7           | 1.000 | 139.6           | 0.999 |
| 0.35 | 167.1  | 0.999 | 143.3           | 0.996 | 137.7           | 1.000 | 137.9           | 0.999 | 140.0           | 0.999 | 136.6           | 0.998 |
| 0.40 | 167.4  | 0.999 | 136.4           | 0.997 | 135.5           | 1.000 | 133.7           | 1.000 | 136.5           | 0.999 | 132.3           | 0.998 |
| 0.45 | 167.7  | 0.999 | 131.5           | 0.997 | 134.2           | 1.000 | 132.4           | 1.000 | 133.7           | 0.999 | 129.7           | 0.998 |
| 0.50 | 166.2  | 0.999 | 130.8           | 0.997 | 133.5           | 1.000 | 132.0           | 1.000 | 132.3           | 0.998 | 129.3           | 0.998 |
| 0.55 | 165.0  | 0.999 | 131.2           | 0.997 | 132.8           | 0.999 | 132.2           | 1.000 | 131.7           | 0.998 | 129.4           | 0.998 |
| 0.60 | 162.9  | 0.999 | 132.0           | 0.997 | 132.7           | 1.000 | 132.7           | 1.000 | 131.5           | 0.998 | 129.4           | 0.998 |
| 0.65 | 159.9  | 0.999 | 132.9           | 0.997 | 132.8           | 0.999 | 133.4           | 0.999 | 131.6           | 0.998 | 129.5           | 0.998 |
| 0.70 | 158.1  | 0.998 | 134.1           | 0.997 | 132.8           | 0.999 | 134.3           | 0.999 | 131.9           | 0.998 | 129.5           | 0.998 |
| 0.75 | 156.1  | 0.997 | 135.5           | 0.997 | 134.1           | 0.999 | 135.3           | 0.999 | 132.0           | 0.998 | 129.3           | 0.998 |
| 0.80 | 160.1  | 0.997 | 137.5           | 0.996 | 134.1           | 0.999 | 136.7           | 0.999 | 132.0           | 0.997 | 129.4           | 0.997 |
| 0.85 | 170.3  | 0.997 | 141.5           | 0.995 | 137.0           | 0.999 | 140.2           | 0.999 | 131.5           | 0.995 | 130.8           | 0.997 |
| 0.90 | 189.3  | 0.997 | 150.5           | 0.993 | 142.7           | 0.998 | 149.9           | 0.998 | 135.3           | 0.980 | 135.8           | 0.996 |
| 0.95 | 222.4  | 0.996 | 173.7           | 0.978 | 159.6           | 0.992 | 175.0           | 0.988 | 159.9           | 0.959 | 147.7           | 0.993 |
